# Supplementary material for: Cholinesterase Inhibitors from an Endophytic Fungus Aspergillus niveus Fv-er401: Metabolomics, Isolation and Molecular Docking
Source: MDPI journal article supplement (doi:10.3390/molecules28062559), 2023-03-11
Supplement: s1 [file s1]

## Supporting Information

### Cholinesterase Inhibitors from an Endophytic Fungus *Aspergillus niveus* Fv-er401: Metabolomics, Isolation and Molecular Docking

Ahmed A. Hamed <sup>1,\*</sup>, Riham A. El-Shiekh <sup>1</sup>, Osama G. Mohamed <sup>1,2</sup>, Elsayed A. Aboutabl <sup>1</sup>, Fify I. Fathy <sup>1</sup>, Ghada A. Fawzy <sup>1,\*</sup>, Areej M. Al-Taweel <sup>3</sup>, Tarek R. Elsayed <sup>4</sup>, Ashootosh Tripathi <sup>2,5</sup> and Ahmed A. Al-Karmalawy <sup>6</sup>

<sup>1</sup> Pharmacognosy Department, Faculty of Pharmacy, Cairo University, Kasr el Aini St., Cairo 11562, Egypt

<sup>2</sup> Natural Products Discovery Core, Life Sciences Institute, University of Michigan, Ann Arbor, MI 48109, USA

<sup>3</sup> Department of Pharmacognosy, College of Pharmacy, King Saud University, Riyadh 11495, Saudi Arabia

<sup>4</sup> Agricultural Microbiology Department, Faculty of Agriculture, Cairo University, Giza 12613, Egypt

<sup>5</sup> Department of Medicinal Chemistry, College of Pharmacy, University of Michigan, Ann Arbor, MI 48109, USA

<sup>6</sup> Pharmaceutical Chemistry Department, Faculty of Pharmacy, Ahran Canadian University, 6th of October City 12566, Egypt;

\* Correspondence: ahmed.adel@pharma.cu.edu.eg (A.A.H.); ghada.ah.fawzy@pharma.cu.edu.eg (G.A.F.)

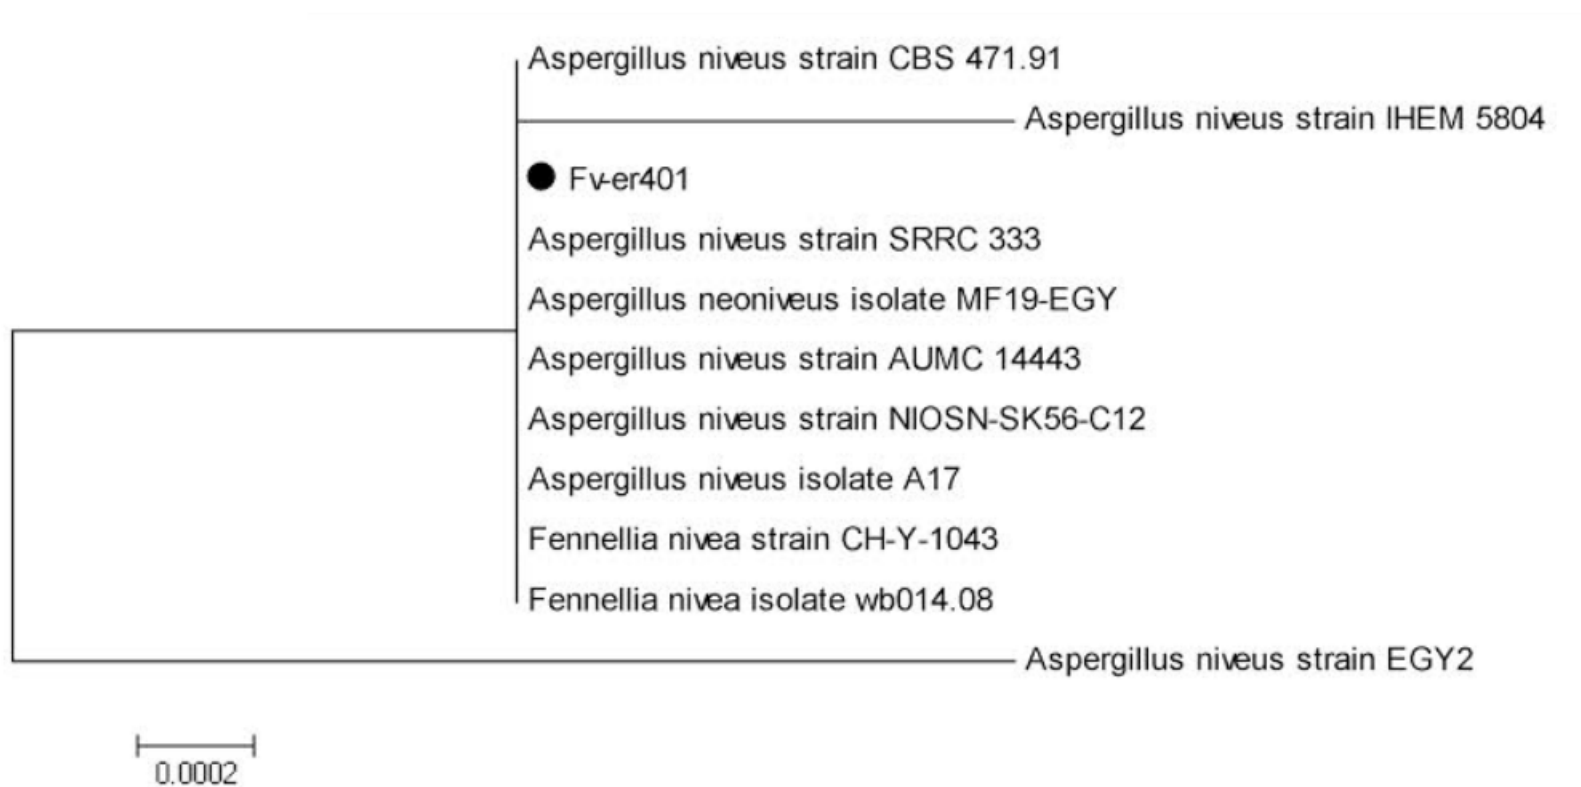

**Figure S1.** Phylogenetic analysis of *Aspergillus niveus* Fv-er401.

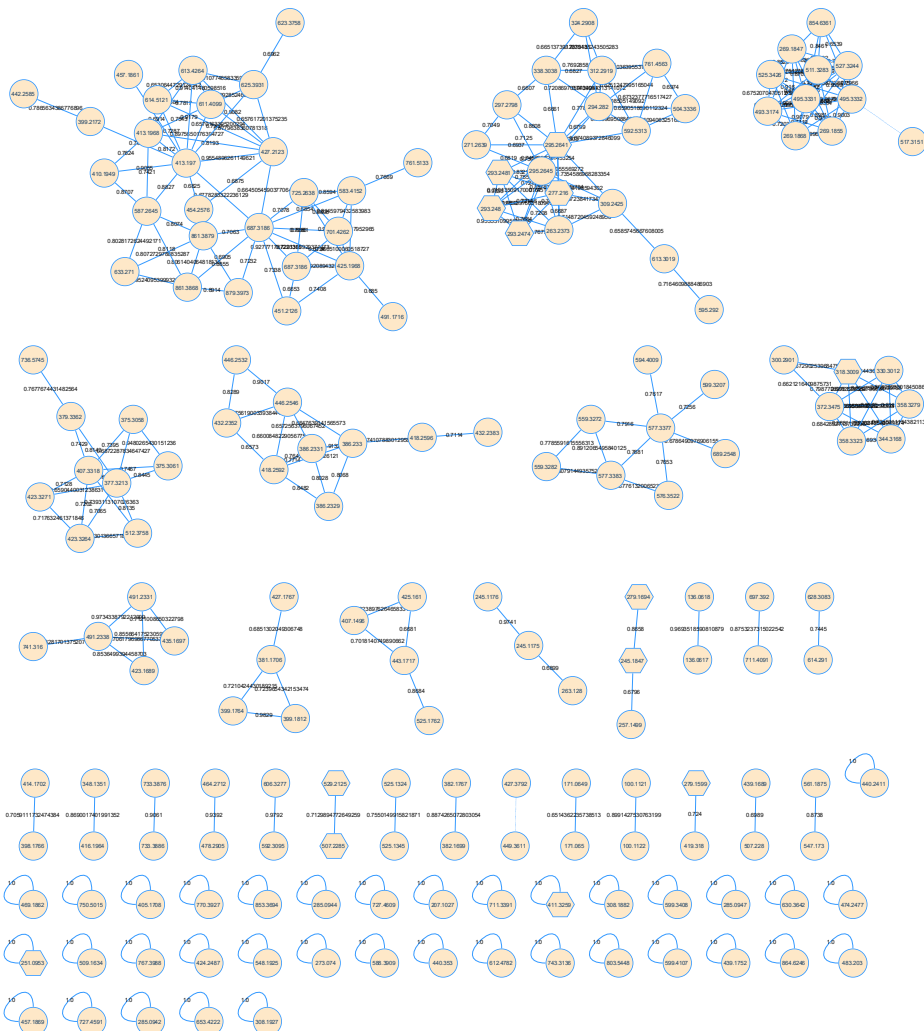

**Figure S2.** GNPS molecular network of *Aspergillus niveus* Fv-er401 ethyl acetate extract in the positive ion mode. The node label represents precursor mass ( $m/z$ ), while the edge label represents the cosine score.

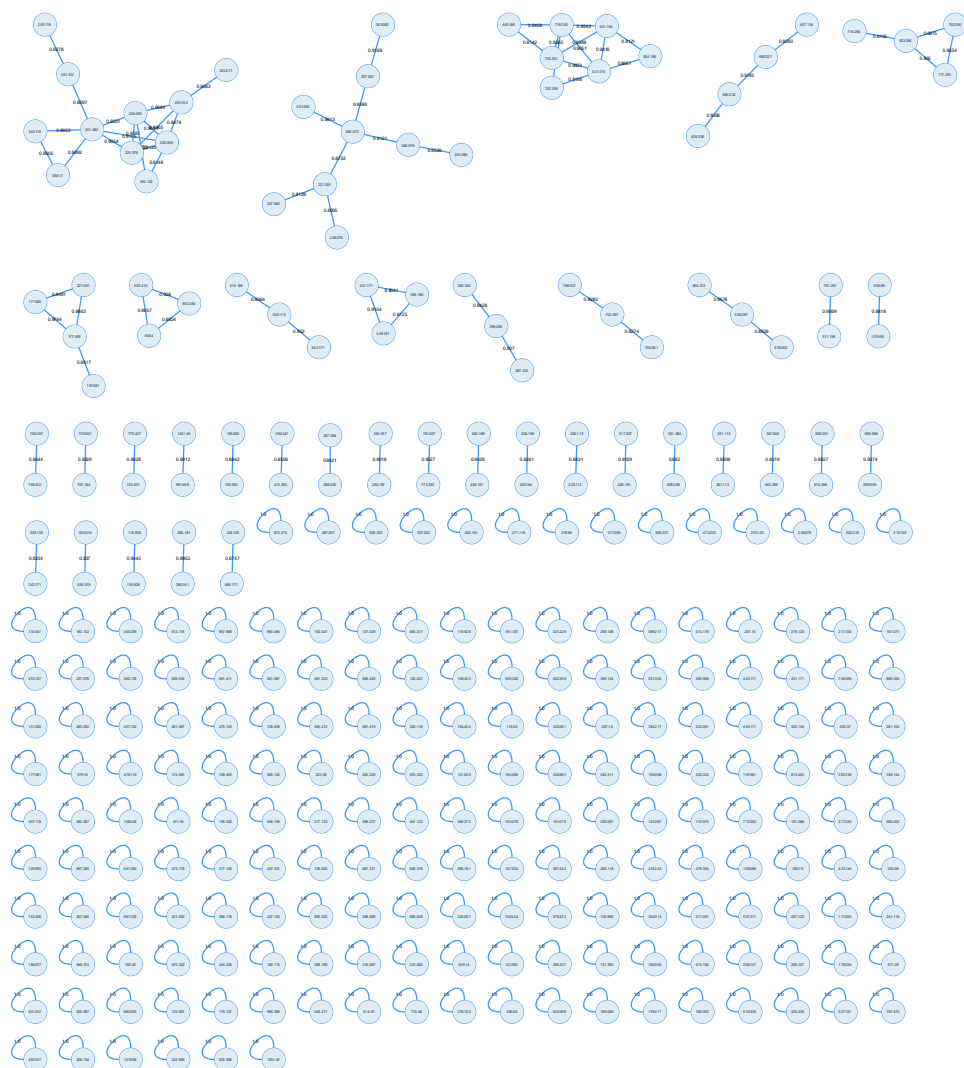

**Figure S3.** GNPS molecular network of *Aspergillus niveus* Fv-er401 ethyl acetate extract in the negative ion mode. The node label represents precursor mass ( $m/z$ ), while the edge label represents the cosine score.

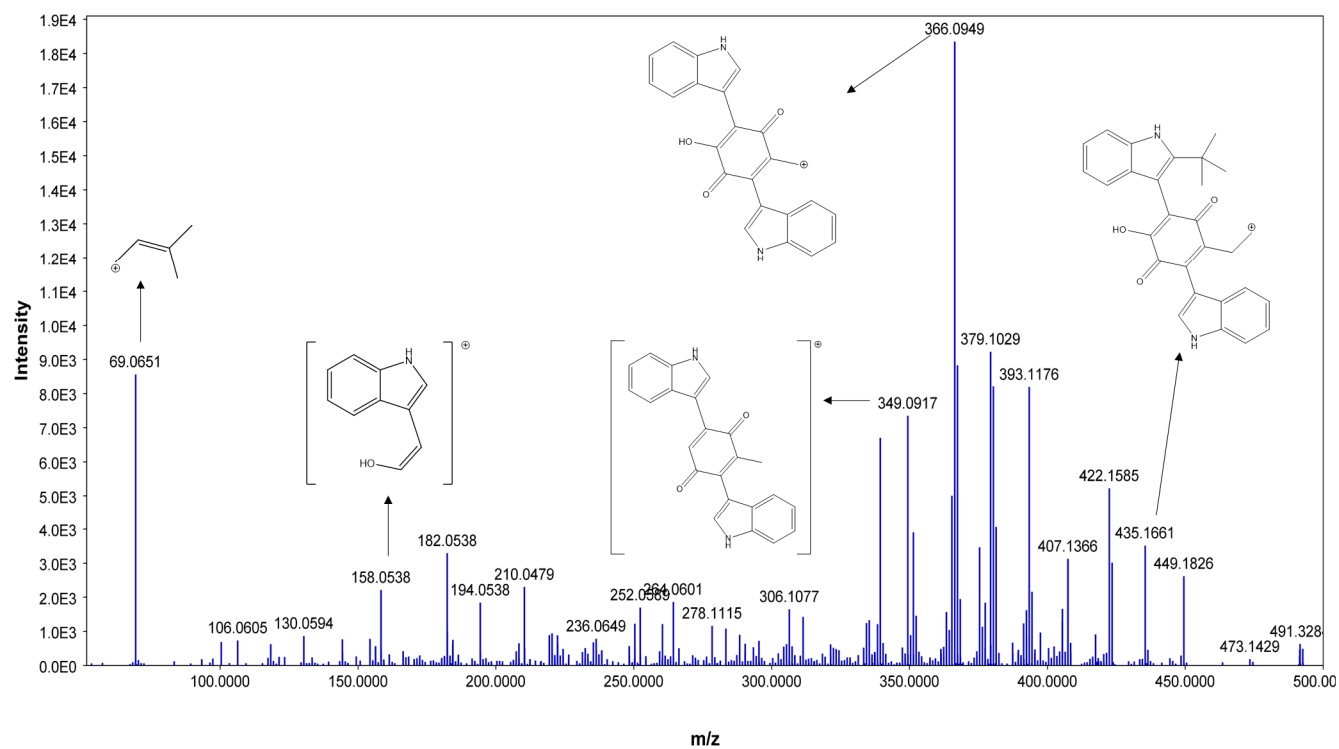

**Figure S4. MS/MS fragmentation of terrequinone A (Compound 7).**

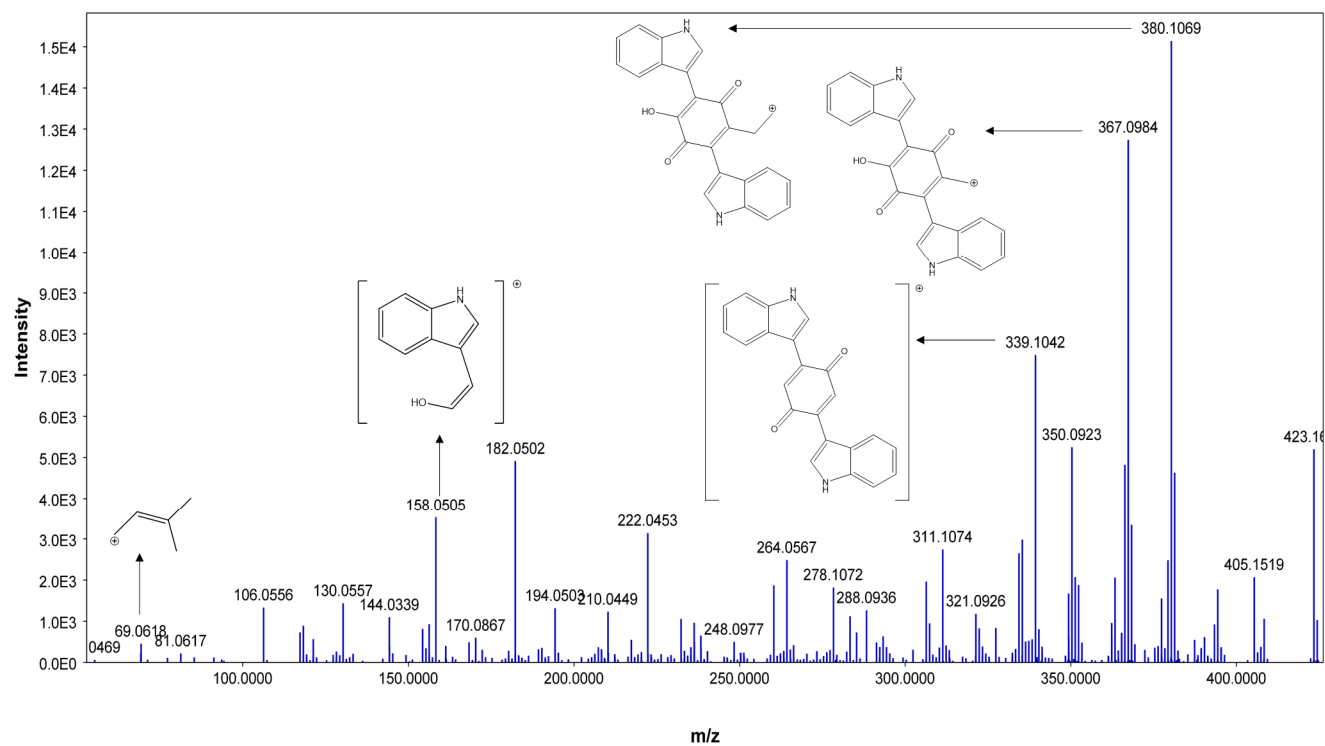

**Figure S5. MS/MS fragmentation of ochrindole D (Compound 8).**

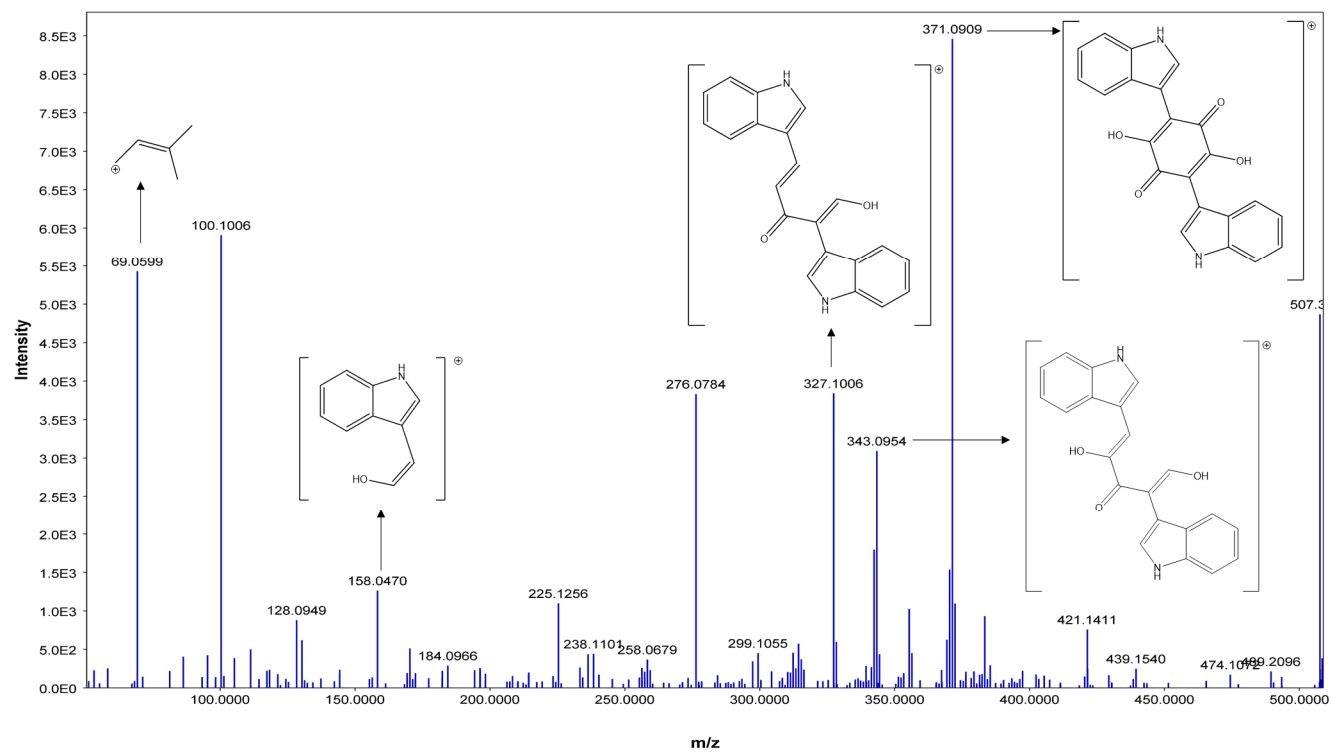

**Figure S6. MS/MS fragmentation of asterriquinone CT5 (Compound 9).**

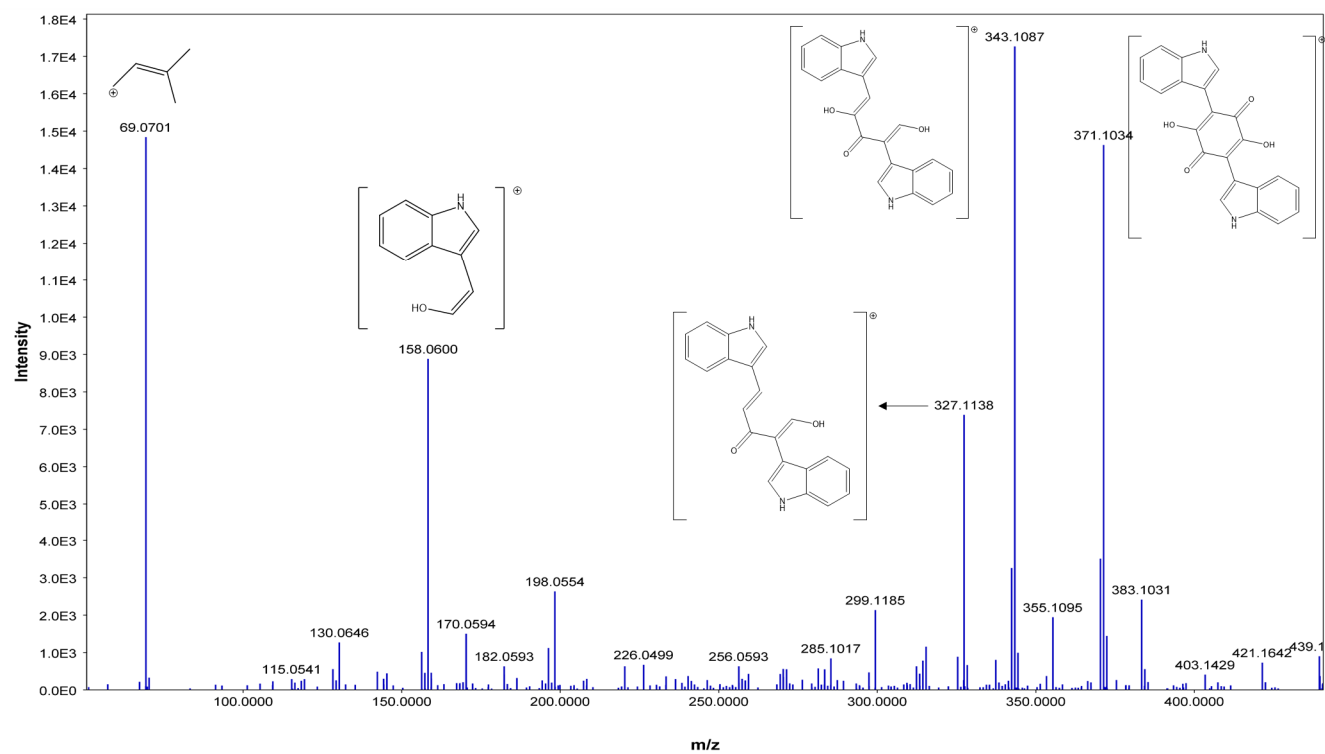

**Figure S7. Predicted fragmentation pattern of Asterriquinone SU-5228 (Compound 6).**



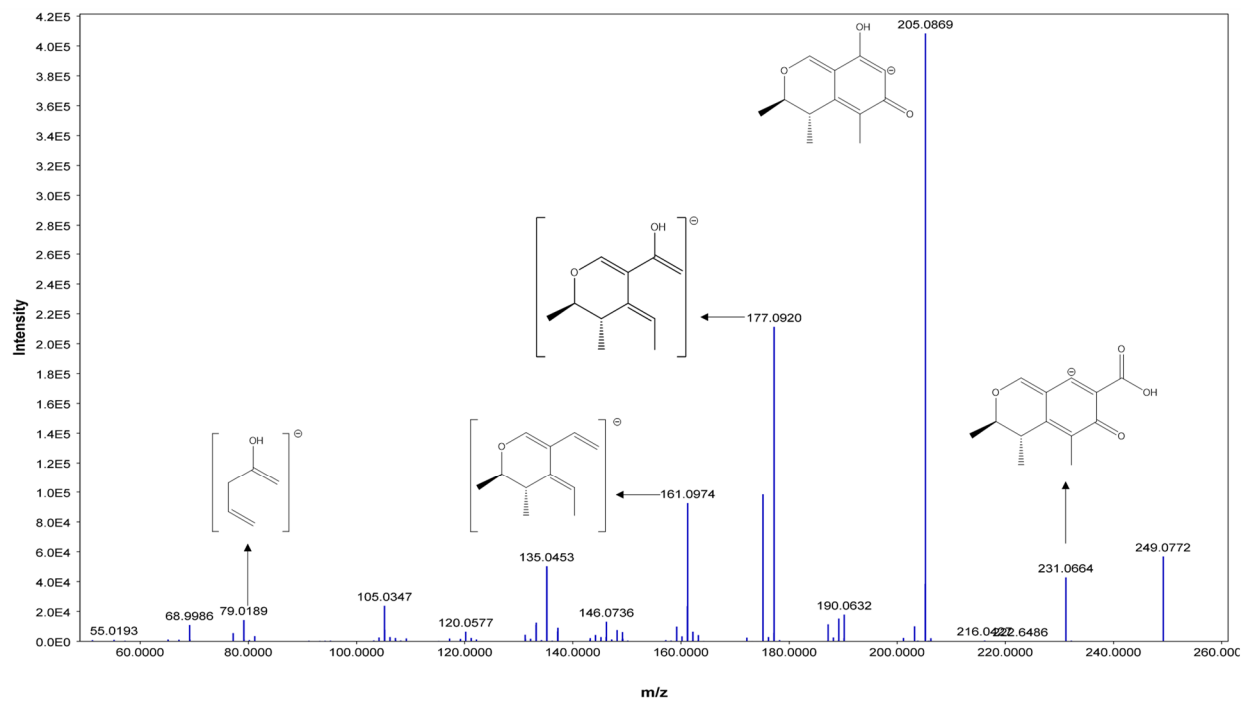

**Figure S8. MS/MS fragmentation of citrinin (Compound 3).**

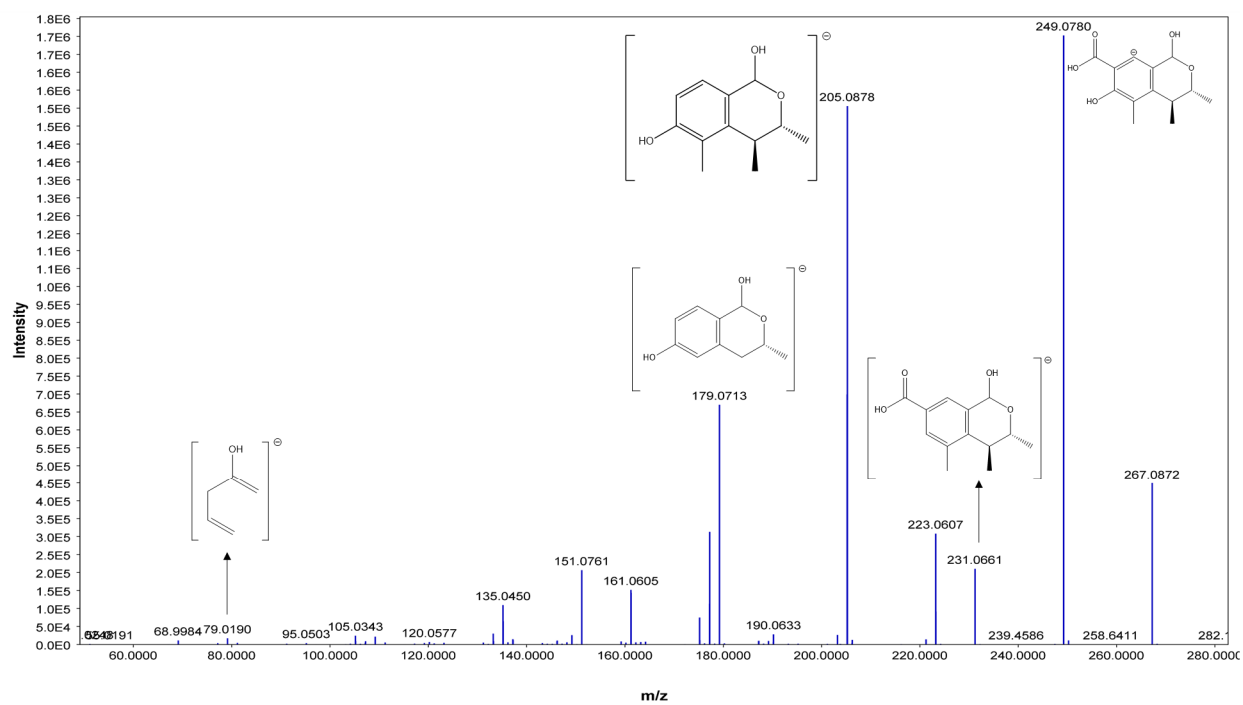

Figure S9. MS/MS fragmentation of citrinin hydrate (Compound 2).

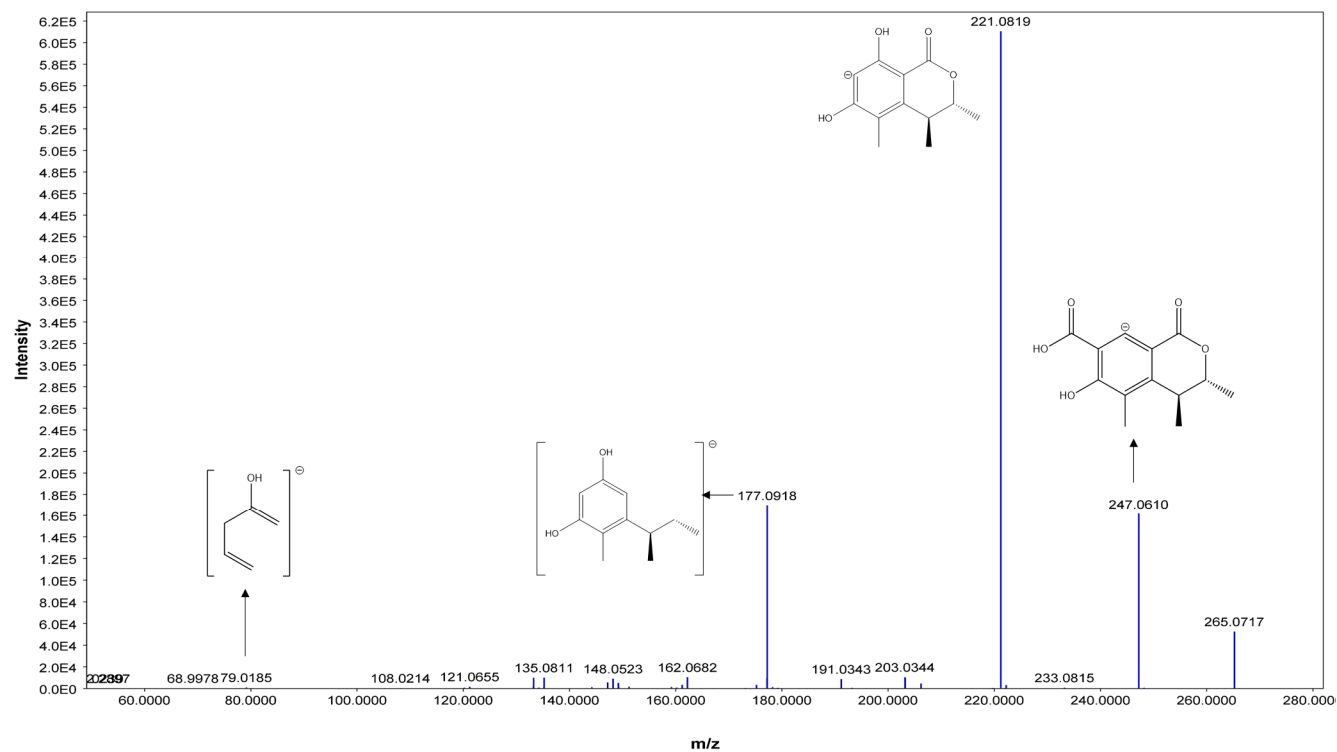

**Figure S10. MS/MS fragmentation of dihydrocitrinone (DHC, Compound 1).**

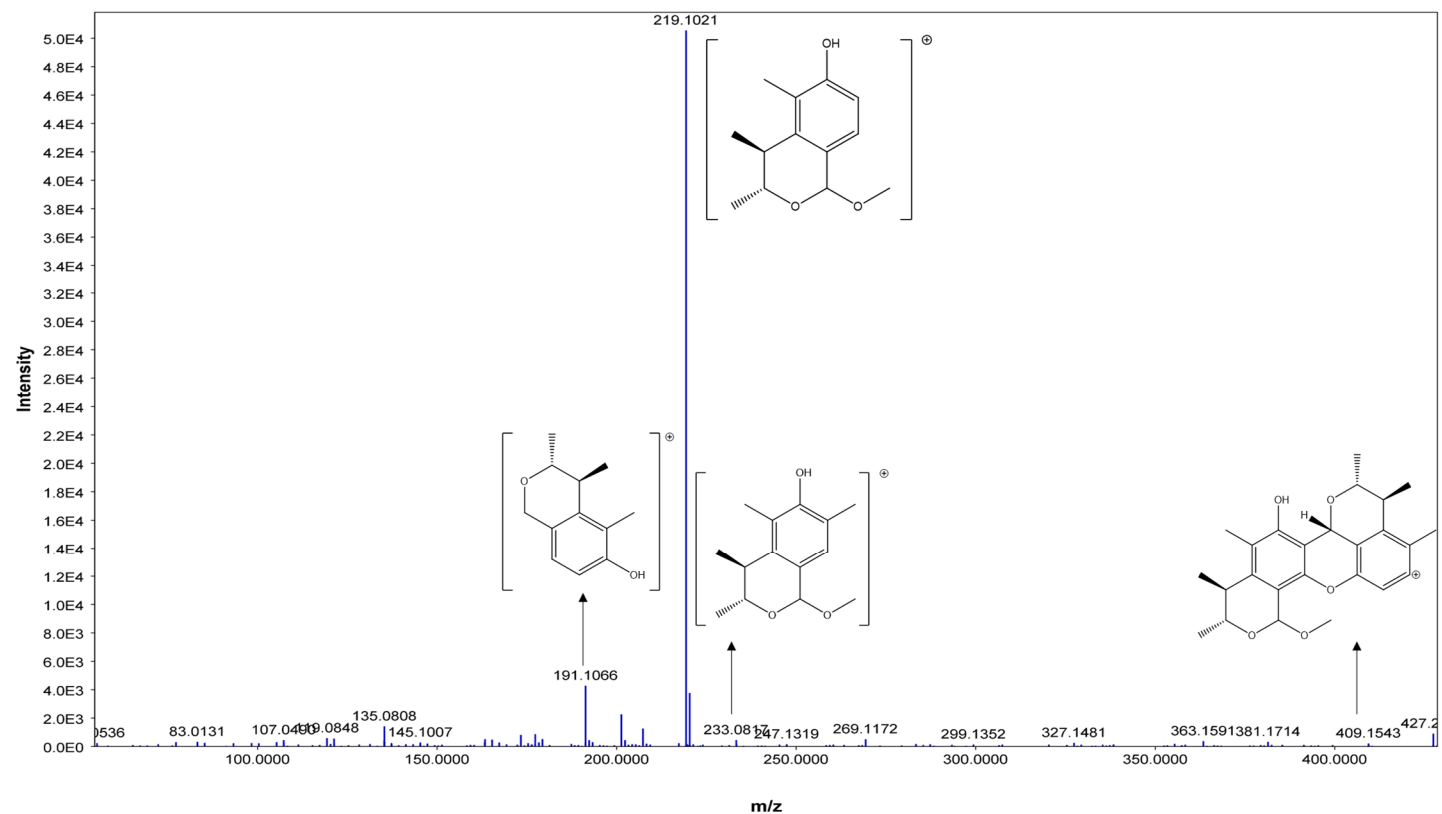

Figure S11. MS/MS fragmentation of dicitrinol A (Compound 4).

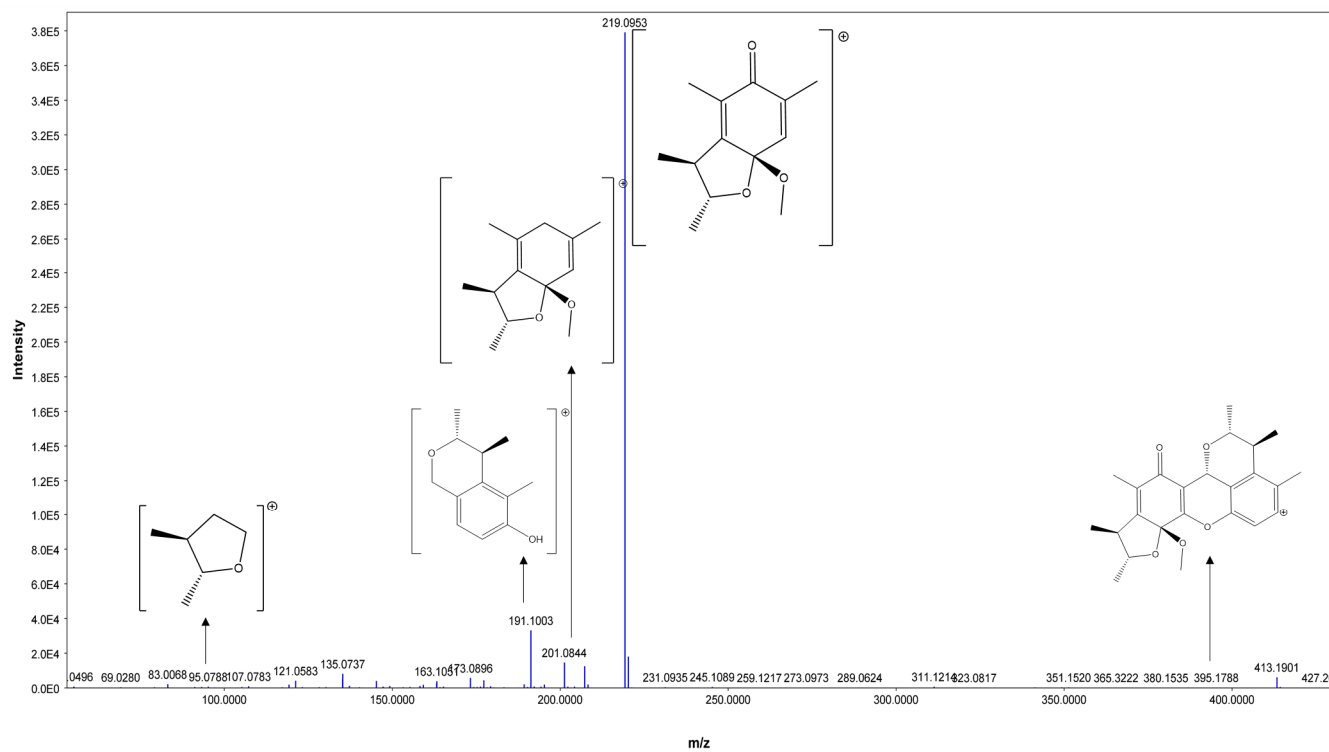

**Figure S12. MS/MS fragmentation of penicitrinol B (Compound 5).**

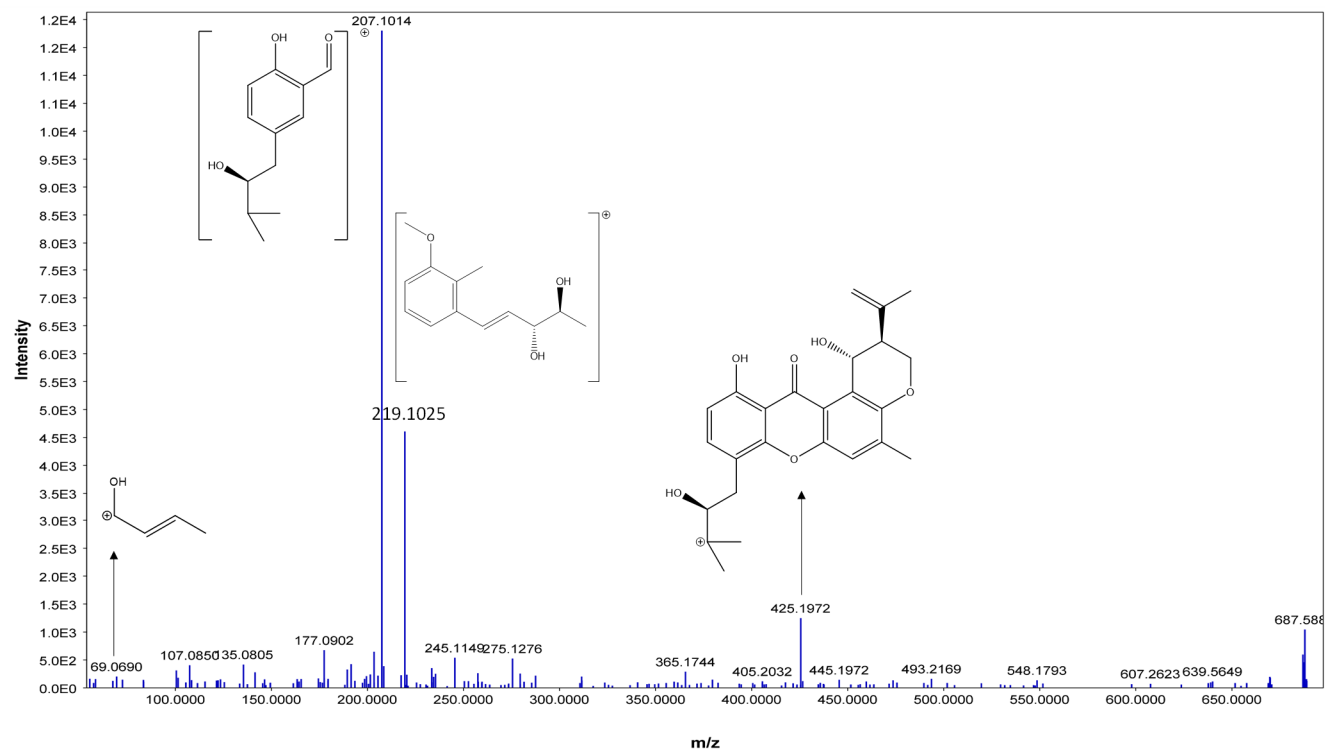

**Figure S13. MS/MS fragmentation of varioxiranol G (Compound 10).**

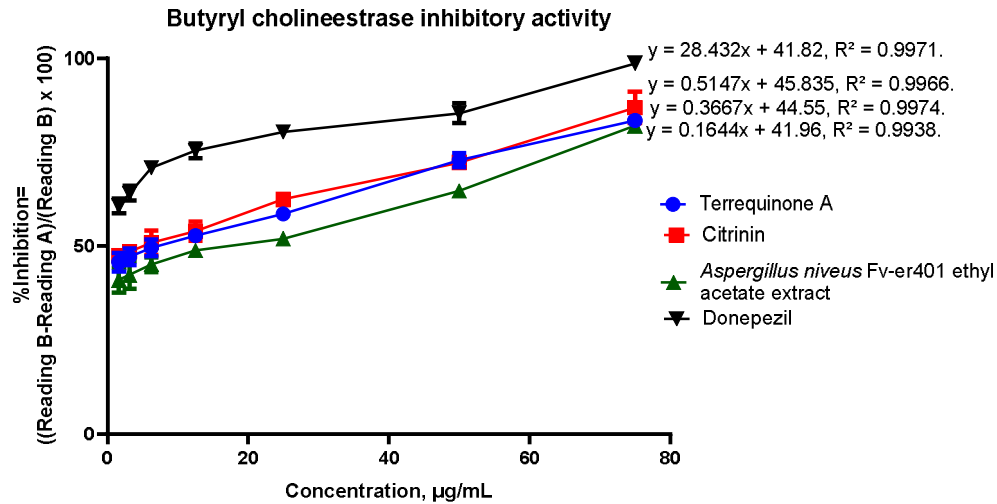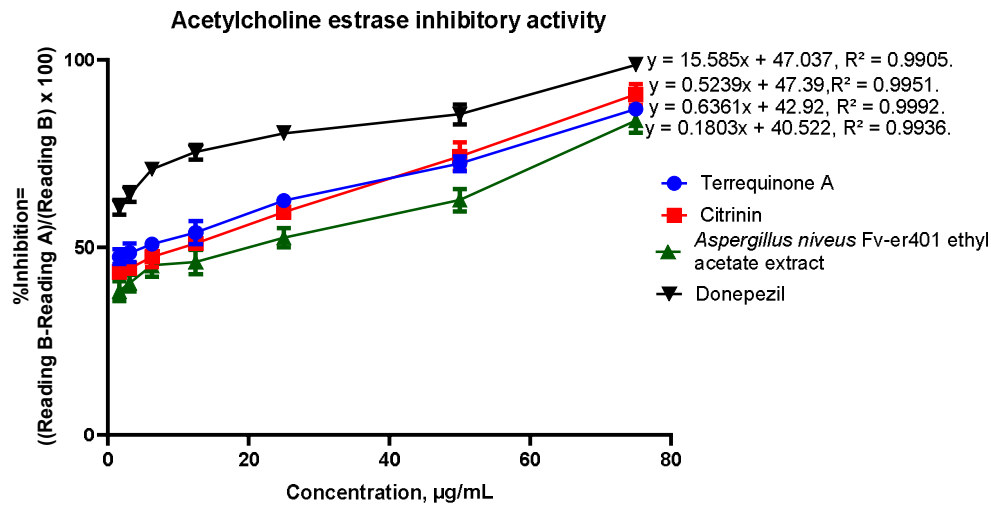

**Figure S14. Graphs of acetylcholinesterase and butyrylcholinesterase inhibitory activity. The intensity of the developed color after the addition of inhibitor was measured at 405 nm as Reading A, and a control without the inhibitor was measured as Reading B. IC<sub>50</sub> values (concentration at which there is 50 % enzyme-catalyzed reaction) were calculated from the equation.**

**Table S1. Putatively identified features of *Aspergillus niveus* Fv-er401 ethyl acetate extract in positive and negative modes.**

| No. | R <sub>t</sub><br>(min) | Compound name                                                                      | Adduct | Precursor mass | Molecular formula                                             | MS/MS Fragmentation Product Ions                | Chemical class |
|-----|-------------------------|------------------------------------------------------------------------------------|--------|----------------|---------------------------------------------------------------|-------------------------------------------------|----------------|
| 1   | 1.0519                  | Ile-leu                                                                            | M+H    | 245.1847       | C <sub>12</sub> H <sub>24</sub> N <sub>2</sub> O <sub>3</sub> | 69.0671, 86.0933, 87.0961, 110.0556             | Peptide        |
| 2   | 2.1895                  | 5-Amino-2-[[ <i>(Z)</i> -3-methylhex-2-enoyl]amino]-5-oxopentanoic acid            | M+H    | 257.1499       | C <sub>12</sub> H <sub>20</sub> N <sub>2</sub> O <sub>4</sub> | 69.0701, 84.0444, 86.0964, 129.0657             | Carboxamide    |
| 3   | 2.6321                  | <b>Huaspenone B</b>                                                                | M-H    | 267.1235       | C <sub>14</sub> H <sub>20</sub> O <sub>5</sub>                | 85.0661, 123.0816, 167.0713, 179.1077           | Polyketides    |
| 4   | 2.6968                  | 2-Hydroxy-3-(3,4,5-trimethoxyphenyl)propanoic acid                                 | M-H    | 255.0872       | C <sub>12</sub> H <sub>16</sub> O <sub>6</sub>                | 152.0477, 167.0711, 193.0502, 255.0868          | Organic acid   |
| 5   | 2.7436                  | <i>N,N</i> ,2-Trimethylallylamin                                                   | M+H    | 100.1122       | C <sub>6</sub> H <sub>13</sub> N                              | 56.0402, 58.0558, 71.9185, 100.1005             | Amines         |
| 6   | 2.7984                  | Phenol A acid                                                                      | M-H    | 239.0967       | C <sub>12</sub> H <sub>16</sub> O <sub>5</sub>                | 109.0658, 151.077, 177.0556, 239.0924           | Organic acid   |
| 7   | 2.8687                  | 2,2-Dimethyl-6-methoxy-4-chromanone                                                | M+H    | 207.1027       | C <sub>12</sub> H <sub>14</sub> O <sub>3</sub>                | 143.0857, 174.0679, 189.0914, 207.102           | Chromanone     |
| 8   | 3.0662                  | 3-Acetyl-5-(5-hydroxyhexa-1,3-dien-1-yl)-4-methoxy-5-methyl-2,5-Dihydrofuran-2-one | M-H    | 265.1079       | C <sub>14</sub> H <sub>18</sub> O <sub>5</sub>                | 121.0656, 123.0815, 167.0702, 179.1072          | Furanone       |
| 9   | 3.2509                  | <b>Phomalone</b>                                                                   | M-H    | 253.1072       | C <sub>13</sub> H <sub>18</sub> O <sub>5</sub>                | 109.0659, 151.076, 177.0551, 195.066            | Phomalone      |
| 10  | 3.2701                  | <b>Dihydrocitrinone</b>                                                            | M-H    | 265.0733       | C <sub>13</sub> H <sub>14</sub> O <sub>6</sub>                | 79.0185, 162.0682, 177.0918, 221.0819, 247.0610 | Benzopyran     |
| 11  | 3.5003                  | <b>4,6-Dimethylcurvulinic acid</b>                                                 | M-H    | 237.0767       | C <sub>12</sub> H <sub>14</sub> O <sub>5</sub>                | 178.0632, 193.0872, 219.0661, 237.0759          | Phenolic acid  |
| 12  | 3.5003                  | <b>Globosumone C</b>                                                               | M-H    | 283.0827       | C <sub>13</sub> H <sub>16</sub> O <sub>7</sub>                | 178.0635, 193.0869, 219.0663, 237.0767          | Benzoate ester |
| 13  | 3.6026                  | <b>JG002CPB</b>                                                                    | M+H    | 592.3095       | C <sub>32</sub> H <sub>41</sub> N <sub>5</sub> O <sub>6</sub> | 134.0888, 169.1258, 70.0591, 197.1203           | Peptides       |



|    |            |                               |                          |          |                                                       |                                                    |                             |
|----|------------|-------------------------------|--------------------------|----------|-------------------------------------------------------|----------------------------------------------------|-----------------------------|
| 14 | 3.685      | <b>7-Hydroxyresorcyllide</b>  | M-H                      | 307.1187 | C <sub>16</sub> H <sub>20</sub> O <sub>6</sub>        | 57.0349, 205.0862, 249.0768,<br>307.1184           | Resorcyllide derivatives    |
| 15 | 3.749<br>7 | <b>Diclavatol</b>             | M-H                      | 343.1186 | C <sub>19</sub> H <sub>20</sub> O <sub>6</sub>        | 255.1025, 281.0812, 325.1076,<br>343.118           | Dimethylated<br>tetraketide |
| 16 | 3.768<br>9 | <b>Cycloaspeptide C</b>       | M+H                      | 628.3083 | C <sub>35</sub> H <sub>41</sub> N <sub>5</sub> O<br>6 | 368.1917, 437.2483, 495.2182,<br>600.313           | Peptides                    |
| 17 | 3.768<br>9 | <b>JG002CPA</b>               | M+H                      | 606.3277 | C <sub>33</sub> H <sub>43</sub> N <sub>5</sub> O<br>6 | 70.058, 134.0877, 183.14, 211.135                  | Peptides                    |
| 18 | 3.990<br>6 | <b>Norlobaric acid</b>        | M+H                      | 443.1717 | C <sub>24</sub> H <sub>26</sub> O <sub>8</sub>        | 407.1384, 408.1416, 425.1492,<br>426.1524          | Depsidones                  |
| 19 | 4.072<br>9 | <b>Citrinin hydrate</b>       | M-H                      | 267.0909 | C <sub>13</sub> H <sub>16</sub> O <sub>6</sub>        | 79.0190, 179.0714, 205.0881,<br>249.0783, 267.0874 | Benzopyran                  |
| 20 | 4.129<br>1 | <b>Aspergillicin D</b>        | M+H                      | 697.392  | C <sub>36</sub> H <sub>52</sub> N <sub>6</sub> O<br>8 | 70.0652, 86.0963, 98.0599,<br>126.0544             | Peptides                    |
| 21 | 4.166      | <b>Citrinin</b>               | M-H                      | 249.0802 | C <sub>13</sub> H <sub>14</sub> O <sub>5</sub>        | 79.0189, 161.0974, 177.0920,<br>205.0859, 231.0664 | Benzopyran                  |
| 22 | 4.171<br>1 | <b>Folipastatin</b>           | M+H                      | 381.1706 | C <sub>23</sub> H <sub>24</sub> O <sub>5</sub>        | 339.123, 348.1359, 351.1235,<br>363.1598           | Depsidone                   |
| 23 | 4.184<br>5 | <b>Deflectin 2a</b>           | M+H                      | 399.2172 | C <sub>24</sub> H <sub>30</sub> O <sub>5</sub>        | 83.0411, 177.1176, 205.1129,<br>207.0917           | Polyketides                 |
| 24 | 4.212<br>6 | <b>Aspochalasin S</b>         | M+Na                     | 424.2487 | C <sub>24</sub> H <sub>35</sub> NO <sub>4</sub>       | 376.1913, 391.2137, 406.2377,<br>425.1954          | Cytochalasan alkaloids      |
| 25 | 4.258<br>4 | <b>Aspergillicin C</b>        | M+H                      | 711.4091 | C <sub>37</sub> H <sub>54</sub> N <sub>6</sub> O<br>8 | 70.0653, 98.0601, 126.0548,<br>134.0963            | Peptides                    |
| 26 | 4.424<br>6 | <b>Epi-aszonalenin A</b>      | M+H                      | 416.1964 | C <sub>25</sub> H <sub>25</sub> N <sub>3</sub> O<br>3 | 69.0609, 130.0541, 147.0443,<br>306.1132           | Peptide alkaloids           |
| 27 | 4.461<br>2 | <b>Phytosphingosine</b>       | M+H                      | 318.3009 | C <sub>18</sub> H <sub>39</sub> NO <sub>3</sub>       | 56.0408, 57.0609, 60.0354,<br>282.2682             | Sphingoid base              |
| 28 | 4.480<br>1 | <b>Linoleoyl ethanolamide</b> | M+H                      | 324.2908 | C <sub>20</sub> H <sub>37</sub> NO <sub>2</sub>       | 60.0447, 74.0603, 93.0697,<br>306.2794             | N-acylethanolamine          |
| 29 | 4.535<br>5 | <b>Aspergisidone</b>          | M+H                      | 425.161  | C <sub>24</sub> H <sub>24</sub> O <sub>7</sub>        | 351.0865, 389.1392, 407.1503,<br>408.1537          | Depsidones                  |
| 30 | 4.554      | <b>Palmitoyl serinol</b>      | M+H-<br>H <sub>2</sub> O | 312.2919 | C <sub>19</sub> H <sub>39</sub> NO <sub>3</sub>       | 55.045, 69.0596, 86.0491, 95.0743                  | Fatty Acyls                 |

|    |            |                                                    |      |          |                                                       |                                                               |                                   |
|----|------------|----------------------------------------------------|------|----------|-------------------------------------------------------|---------------------------------------------------------------|-----------------------------------|
| 31 | 4.571<br>7 | <b>Terretonin C</b>                                | M-H  | 429.1919 | C <sub>24</sub> H <sub>30</sub> O <sub>7</sub>        | 81.034, 205.0858, 249.0759,<br>429.1906                       | Polyketides                       |
| 32 | 4.572<br>4 | Erythro-sphingosine                                | M+H  | 300.2901 | C <sub>18</sub> H <sub>37</sub> NO <sub>2</sub>       | 55.0544, 56.0498, 67.0542,<br>69.0701                         | Sphingosine                       |
| 33 | 4.692<br>5 | 2-Amino-9-methyl-4-octadecene-<br>1,3,8-triol      | M+H  | 330.3012 | C <sub>19</sub> H <sub>39</sub> NO <sub>3</sub>       | 56.0499, 60.0449, 74.0602, 282.28                             | Sphingosine                       |
| 34 | 4.775<br>6 | N-acetylsphinganine                                | M+H  | 344.3168 | C <sub>20</sub> H <sub>41</sub> NO <sub>3</sub>       | 56.0499, 60.0448, 88.076,<br>282.2801                         | Sphinganine                       |
| 35 | 4.849<br>9 | <b>Aspochalasin T</b>                              | M+H  | 418.2596 | C <sub>24</sub> H <sub>35</sub> NO <sub>5</sub>       | 71.0493, 88.0759, 148.0969,<br>271.1696                       | Cytochalasan alkaloids            |
| 36 | 5.043<br>5 | <b>2-Amino-9-methylicos-4-ene-<br/>1,3,8-triol</b> | M+H  | 358.3323 | C <sub>21</sub> H <sub>43</sub> NO <sub>3</sub>       | 56.0458, 57.0661, 60.0405, 74.056                             | Dehydrophytosphingosine           |
| 37 | 5.062      | <b>Demethyltrichodimerol</b>                       | M+H  | 483.203  | C <sub>27</sub> H <sub>30</sub> O <sub>8</sub>        | 215.0976, 233.1079, 234.1102,<br>251.0823                     | Oxidized dimers of<br>sorbicillin |
| 38 | 5.098<br>9 | N-(1,3-dihydroxyicosan-2-yl)<br>acetamide          | M+H  | 372.3475 | C <sub>22</sub> H <sub>45</sub> NO <sub>3</sub>       | 56.0498, 60.0448, 88.0757,<br>310.3109                        | Acetamide                         |
| 39 | 5.098<br>9 | <b>Dicitrinol A</b>                                | M+H  | 427.2123 | C <sub>25</sub> H <sub>30</sub> O <sub>6</sub>        | 191.1066, 201.0906, 219.1021,<br>220.1052, 233.0817, 409.1543 | Polyketide                        |
| 40 | 5.154<br>3 | <b>Penicitrinol B</b>                              | M+H  | 413.197  | C <sub>24</sub> H <sub>28</sub> O <sub>6</sub>        | 95.0788, 191.1003, 201.0844,<br>219.0953, 220.0988, 395.1788  | Polyketide                        |
| 41 | 5.209<br>8 | <b>Asterriquinone SU-5228</b>                      | M+H  | 439.1689 | C <sub>27</sub> H <sub>22</sub> N <sub>2</sub> O<br>4 | 69.0701, 158.06, 327.1138,<br>343.1087, 371.1034              | Bisindole alkaloid                |
| 42 | 5.265<br>2 | <b>JBIR-82</b>                                     | M+H  | 495.3332 | C <sub>29</sub> H <sub>42</sub> N <sub>4</sub> O<br>3 | 72.081, 100.1121, 101.1154,<br>114.0914                       | Terpeptin analogs                 |
| 43 | 5.375<br>7 | <b>Asperphenamate</b>                              | M+Na | 529.2125 | C <sub>32</sub> H <sub>30</sub> N <sub>2</sub> O<br>4 | 100.112, 117.07, 238.123, 292.096                             | Carboxylic ester                  |
| 44 | 5.764      | <b>Terrequinone A</b>                              | M+H  | 491.2331 | C <sub>32</sub> H <sub>30</sub> N <sub>2</sub> O<br>3 | 69.0651, 158.0538, 349.0917,<br>366.0949, 379.1029, 435.1661  | Bisindole alkaloid                |
| 45 | 5.764      | <b>Ochrindole D</b>                                | M+H  | 423.1689 | C <sub>27</sub> H <sub>22</sub> N <sub>2</sub> O<br>3 | 69.0618, 158.0505, 339.1042,<br>350.0923, 367.0984, 380.1069  | Bisindole alkaloid                |
| 46 | 5.819<br>4 | Phosphatidylethanolamine(15:0/2<br>2:6)            | M+H  | 750.5015 | C <sub>42</sub> H <sub>72</sub> NO <sub>8</sub><br>P  | 57.0703, 59.0493, 71.0857,<br>117.0542                        | Lipids                            |
| 47 | 5.957<br>9 | <b>Asterriquinone CT5</b>                          | M+H  | 507.228  | C <sub>32</sub> H <sub>30</sub> N <sub>2</sub> O<br>4 | 69.0599, 158.0470, 327.1006,<br>343.0954, 371.0909            | Bisindole alkaloid                |

|    |            |                                                                                                                                        |      |          |                                                 |                                                    |                        |
|----|------------|----------------------------------------------------------------------------------------------------------------------------------------|------|----------|-------------------------------------------------|----------------------------------------------------|------------------------|
| 48 | 6.050<br>3 | <b>Gaidic acid</b>                                                                                                                     | M+Na | 277.216  | C <sub>16</sub> H <sub>30</sub> O <sub>2</sub>  | 67.0517, 79.0516, 81.0306,<br>93.0667              | Trihydroxybenzoic acid |
| 49 | 6.290<br>4 | <b>Ergosterol peroxide</b>                                                                                                             | M+H  | 411.3259 | C <sub>28</sub> H <sub>44</sub> O <sub>3</sub>  | 69.0693, 173.0949, 175.1107,<br>191.1055           | Steroid derivative     |
| 50 | 6.456<br>7 | Methyl linolenate                                                                                                                      | M+H  | 293.248  | C <sub>19</sub> H <sub>32</sub> O <sub>2</sub>  | 67.0467, 81.0618, 95.077, 109.092                  | Fatty acid             |
| 51 | 6.456<br>7 | <b>Cytosporolide B</b>                                                                                                                 | M+H  | 559.3272 | C <sub>32</sub> H <sub>46</sub> O <sub>8</sub>  | 233.0804, 234.084, 251.091,<br>329.1746            | Sesquiterpenes         |
| 52 | 6.567<br>5 | <b>Varioxiranol G</b>                                                                                                                  | M+H  | 687.3186 | C <sub>40</sub> H <sub>46</sub> O <sub>10</sub> | 69.0690, 207.1024, 219.1022,<br>425.1973, 493.2238 | Polyketides            |
| 53 | 6.872<br>3 | 3,4,7,12,16-Pentamethyloctadeca-<br>1,3,5,7,9,11,13,15,17-nonaene-<br>1,18-diyl) bis(6-hydroxy-2,4,4-<br>trimethylcyclohex-2-en-1-one) | M+H  | 611.4099 | C <sub>41</sub> H <sub>54</sub> O <sub>4</sub>  | 69.0695,191.1058,219.1017,220.1<br>047             | Fatty alcohol          |
| 54 | 6.927<br>7 | Methyl palmitate                                                                                                                       | M+H  | 271.2639 | C <sub>17</sub> H <sub>34</sub> O <sub>2</sub>  | 55.0549, 57.0705, 69.0704,<br>71.0857              | Fatty acid             |
| 55 | 7.010<br>9 | Methyl oleate                                                                                                                          | M+H  | 297.2798 | C <sub>19</sub> H <sub>36</sub> O <sub>2</sub>  | 55.0545, 57.0701, 69.0701,<br>83.0855              | Fatty acid             |
| 56 | 7.094      | Diadinoxanthin                                                                                                                         | M+H  | 583.4152 | C <sub>40</sub> H <sub>54</sub> O <sub>3</sub>  | 189.0918, 207.1023, 208.1059,<br>273.0741          | Phytopigment           |
| 57 | 7.177<br>1 | 2'-Methoxy-3,1'-Dihydroxy-B,Ψ-<br>Caroten-4-One                                                                                        | M+H  | 613.4264 | C <sub>41</sub> H <sub>56</sub> O <sub>4</sub>  | 69.0795, 191.1184, 219.1134,<br>220.1168           | Carotenoids            |
| 58 | 7.315<br>7 | 3-Hydroxyergosta-4,6,8(14),22-<br>tetraen-15-on                                                                                        | M+H  | 423.3271 | C <sub>29</sub> H <sub>42</sub> O <sub>2</sub>  | 57.0704, 69.0701, 83.0855,<br>85.0652              | Steroids               |

**Table S2: Types and compositions of media**

| Medium                | Composition                                                                                                                           |
|-----------------------|---------------------------------------------------------------------------------------------------------------------------------------|
| Potato dextrose broth | Potato extract (4.0 g), and dextrose (20.0 g), distilled water to 1000mL, pH 5.6                                                      |
| Potato dextrose agar  | Potato extract (4.0 g), dextrose (20.0 g), and agar (15.0 g) distilled water to 1000mL. pH 5.6                                        |
| Wickerham agar        | Yeast extract (3.0 g), malt extract (3.0 g), peptone (5.0 g), dextrose (10.0 g), and agar (20.0 g), distilled water to 1000mL. pH 7.3 |

**Table S3: Parameters for MZmine processing of UHPLC-MS/MS data**

| Processing step       | Parameter                         | Selected values           |
|-----------------------|-----------------------------------|---------------------------|
| Mass list             | MS1 noise level                   | 1.0E3                     |
|                       | MS2 noise level                   | 1.0E2                     |
|                       | Rt (retention time in minutes)    | 1-7.5 min                 |
| Chromatogram building | Algorithm                         | ADAP chromatogram builder |
|                       | Min group size in number of scans | 5                         |
|                       | Group intensity threshold         | 3.0E3                     |
|                       | Min highest intensity             | 3.0E3                     |
|                       | <i>m/z</i> tolerance              | 0-20 ppm                  |
| Deconvolution         | Algorithm                         | Local minimal search      |
|                       | Chromatographic threshold         | 30.0%                     |
|                       | Search minimum in RT range        | 0.2 min                   |
|                       | Minimum relative height           | 10 %                      |
|                       | Minimum absolute height           | 3.0E3                     |
|                       | Min ratio of peak top/edge        | 1                         |
|                       | Peak duration range               | 0-2 min                   |
| Isotope grouping      | <i>m/z</i> tolerance              | 0-10 ppm                  |
|                       | RT tolerance                      | 0.2 min                   |
|                       | Maximum charge                    | 3                         |
| Alignment             | Algorithm                         | Join aligner              |
|                       | <i>m/z</i> tolerance              | 0-20 ppm                  |
|                       | Weight for <i>m/z</i>             | 75%                       |
|                       | RT tolerance                      | 0.2 min                   |
|                       | Weight for RT                     | 25%                       |

**Table S4.** 2D, 3D interactions, and receptor pocket positioning for donepezil and the docked co-crystallized inhibitors within the binding sites of both AChE and BuChE receptors.

| Comp.     | R     | 2D interactions | 3D interactions | 3D positioning |
|-----------|-------|-----------------|-----------------|----------------|
| Donepezil | AChE  |                 |                 |                |
|           | BuChE |                 |                 |                |

| Comp.                     | R     | 2D interactions | 3D interactions | 3D positioning |
|---------------------------|-------|-----------------|-----------------|----------------|
| Co-crystallized inhibitor | AChE  |                 |                 |                |
|                           | BuChE |                 |                 |                |

R<sup>\*</sup>: Receptor.
